# Supplementary material for: A target-activated plasmon coupling surface-enhanced Raman scattering platform for the highly sensitive and reproducible detection of miRNA-21
Source: Royal Society of Chemistry journal article supplement (doi:10.1039/d1nj00173f), 2021-01-01
Supplement: d1nj00173f1.pdf [file d1nj00173f1.pdf]

## Electronic Supplementary Information

Target-activated Plasmon coupling Surface Enhanced Raman scattering  
platform for highly sensitive and reproducible detection of miRNA-21

*Yanfang Cui<sup>a</sup>, Jing Zheng<sup>b</sup>, Wei Zhuang<sup>a</sup>, Haiwang Wang<sup>c,d\*</sup>*

<sup>a</sup> Department of Clinical Laboratory, Binzhou Medical University Hospital, Binzhou, P. R. China

<sup>b</sup> Science and Technology Division, Binzhou Medical University Hospital, Binzhou, P. R. China

<sup>c</sup> College of Biological Sciences and Technology, University of Jinan, Jinan, P. R. China

<sup>d</sup> Institute of Disaster Medicine, Tianjin University, Tianjin, P. R. China

Journal Name: New Journal of Chemistry

Manuscript ID NJ-ART-01-2021-000173

\* Corresponding author. Haiwang Wang. E-mail: 147761705@qq.com;

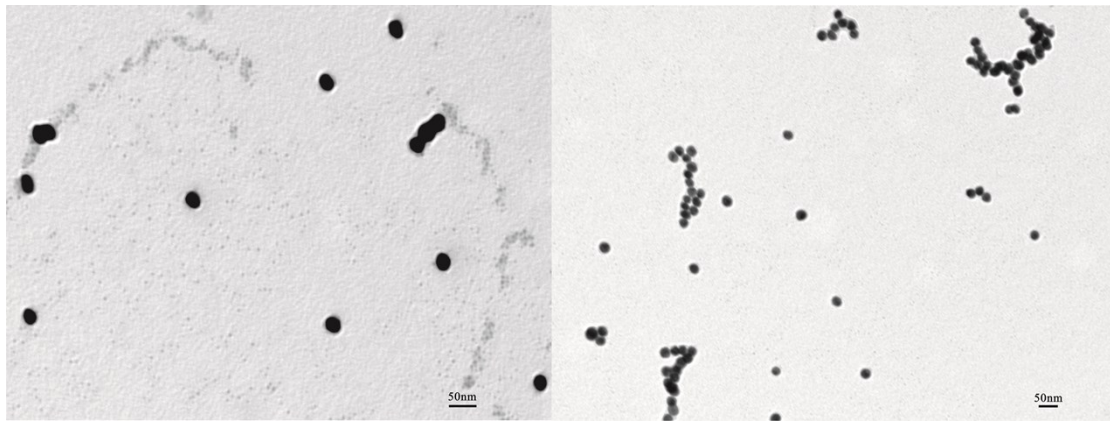

Fig.S1 TEM images of AuNPs modified DNA and 4-NTP incubated with Exo III in the absence (left) and presence (right) of 10 nM miRNA-21.
